# Supplementary material
Source: ML conference proceedings conference paper supplement (https://openreview.net/forum?id=uaQWgFk2Pf)

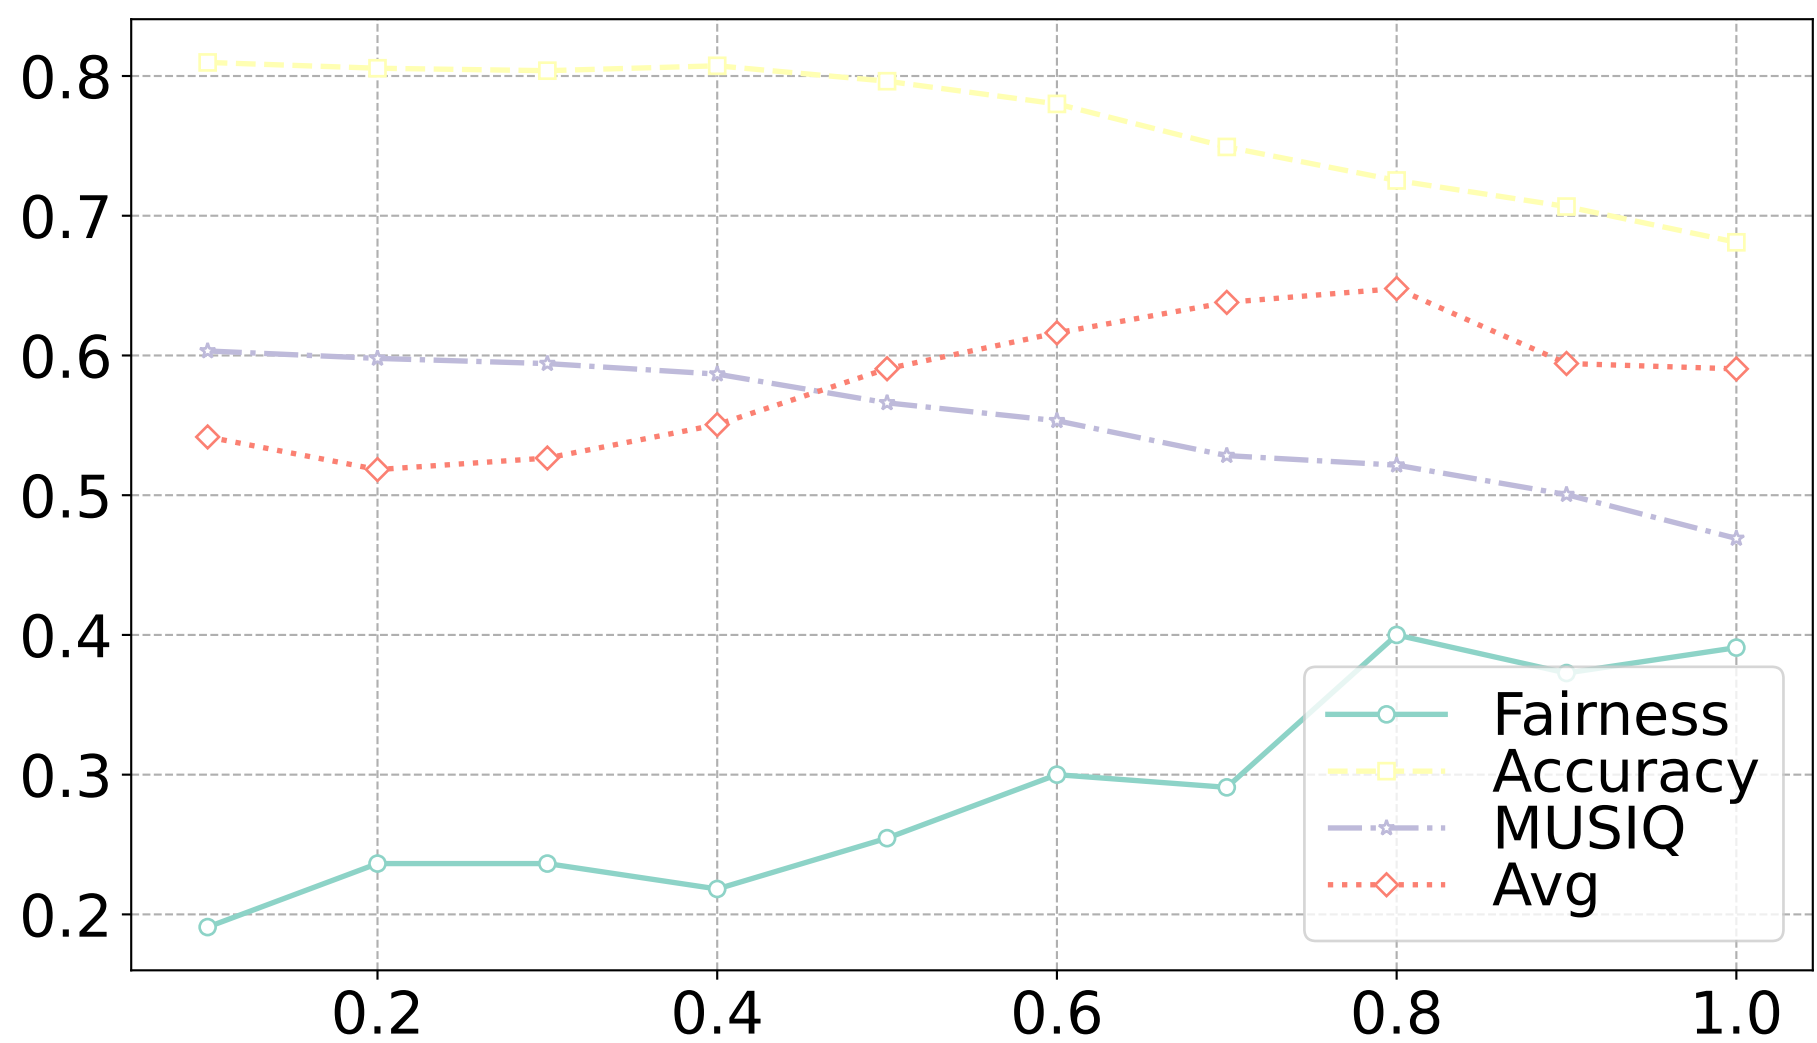

Supplement: supplementary_material [file fpca_gender_enoise.pdf › fair-img-gen-dev-main/paper/neurips25/imgs/fpca_gender_enoise.pdf]

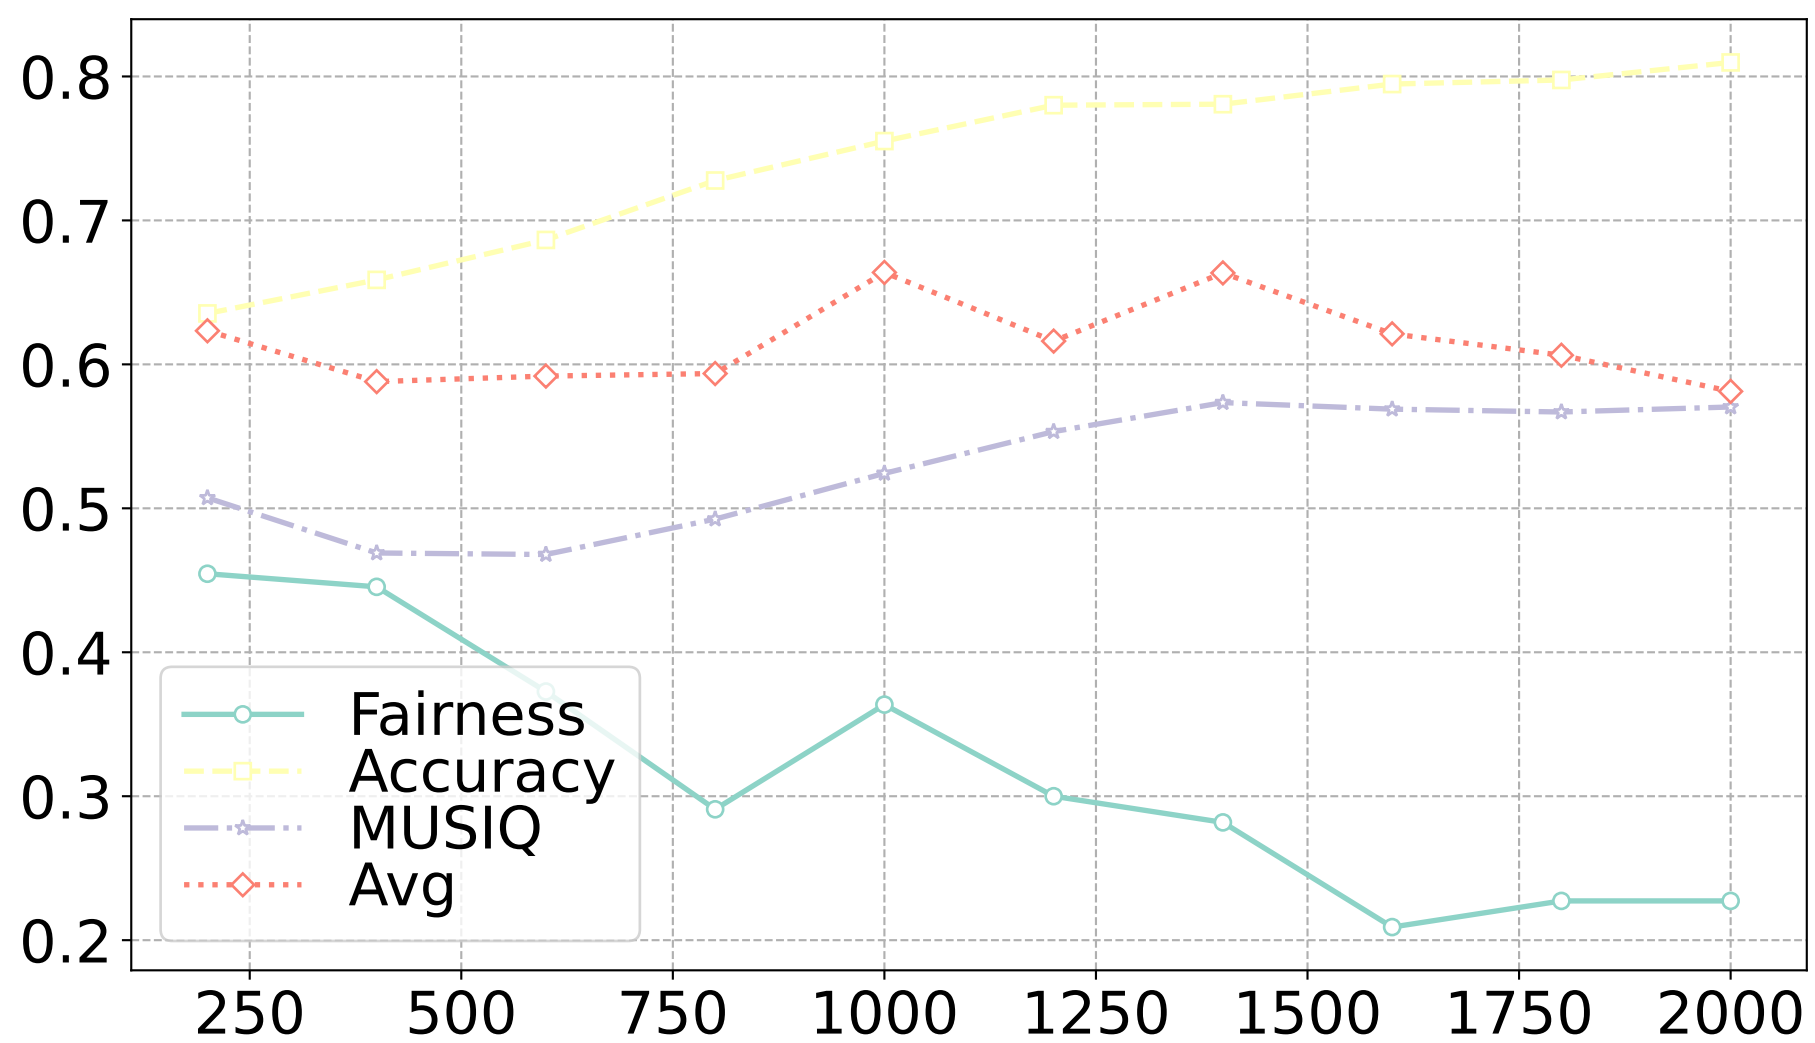

Supplement: supplementary_material [file fpca_gender_hdim.pdf › fair-img-gen-dev-main/paper/neurips25/imgs/fpca_gender_hdim.pdf]

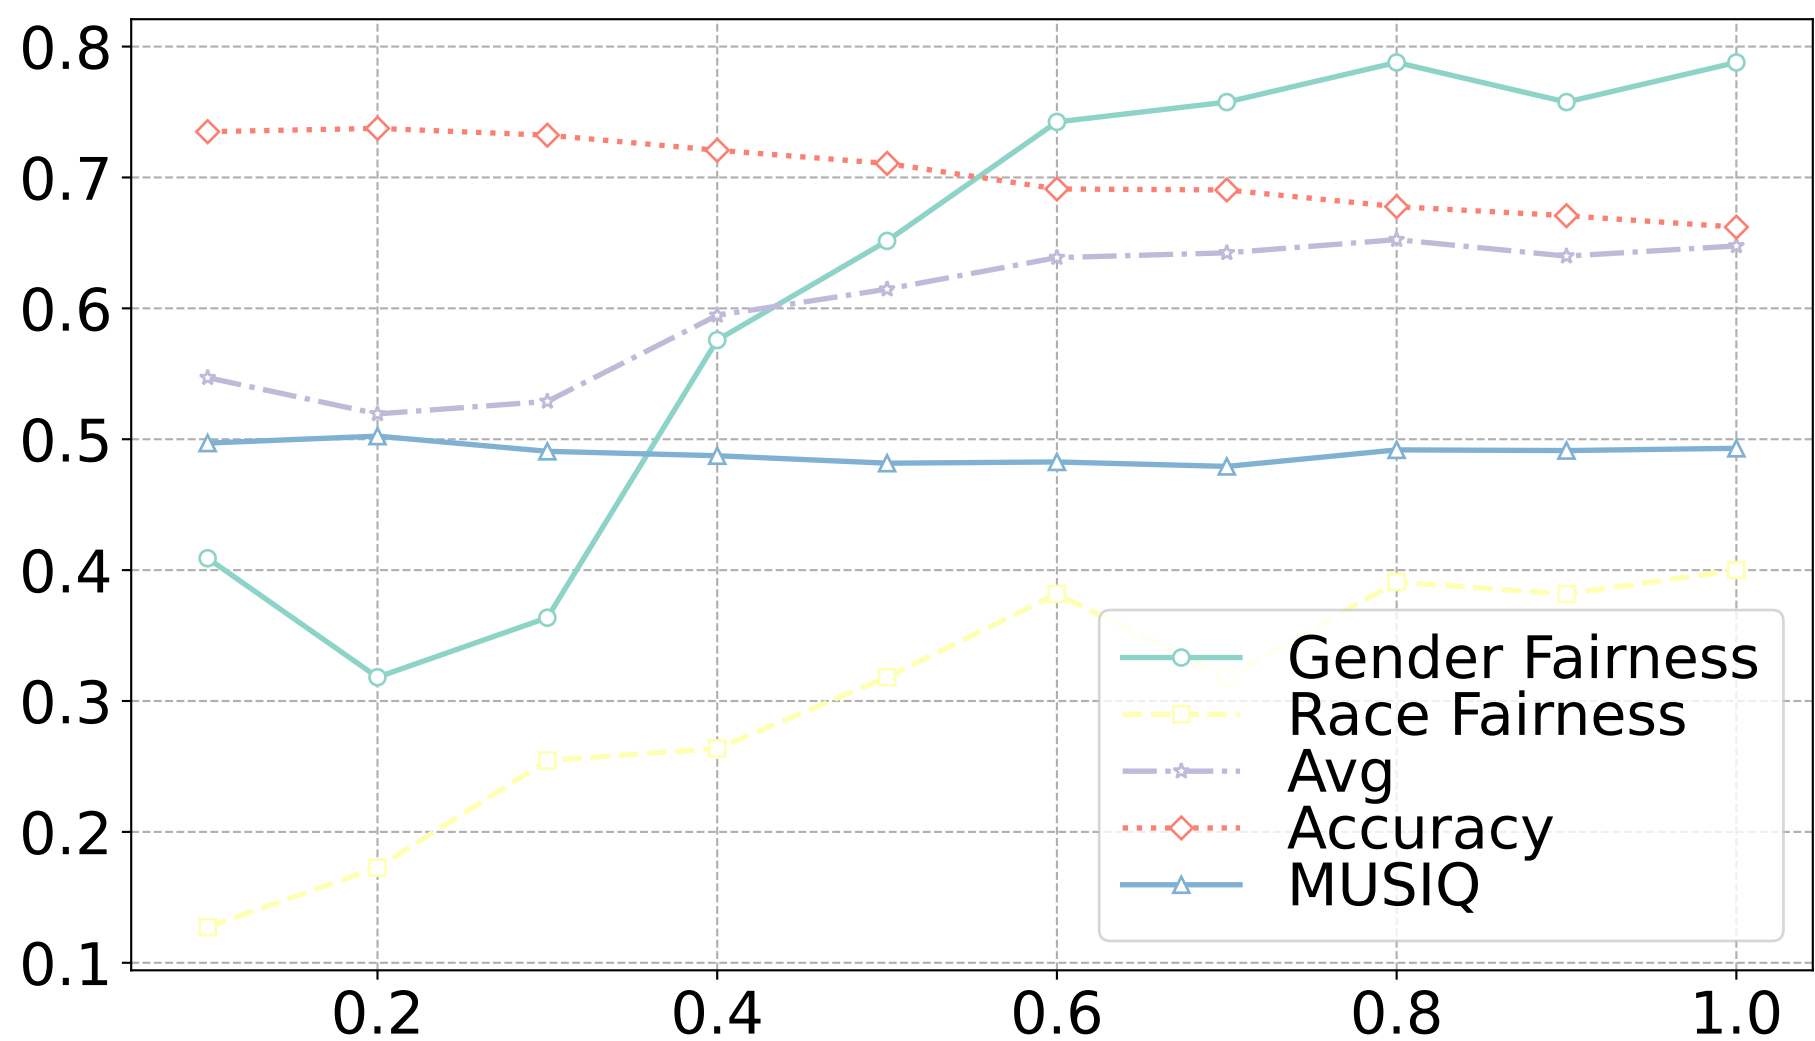

Supplement: supplementary_material [file fpca_genderrace_enoise.pdf › fair-img-gen-dev-main/paper/neurips25/imgs/fpca_genderrace_enoise.pdf]

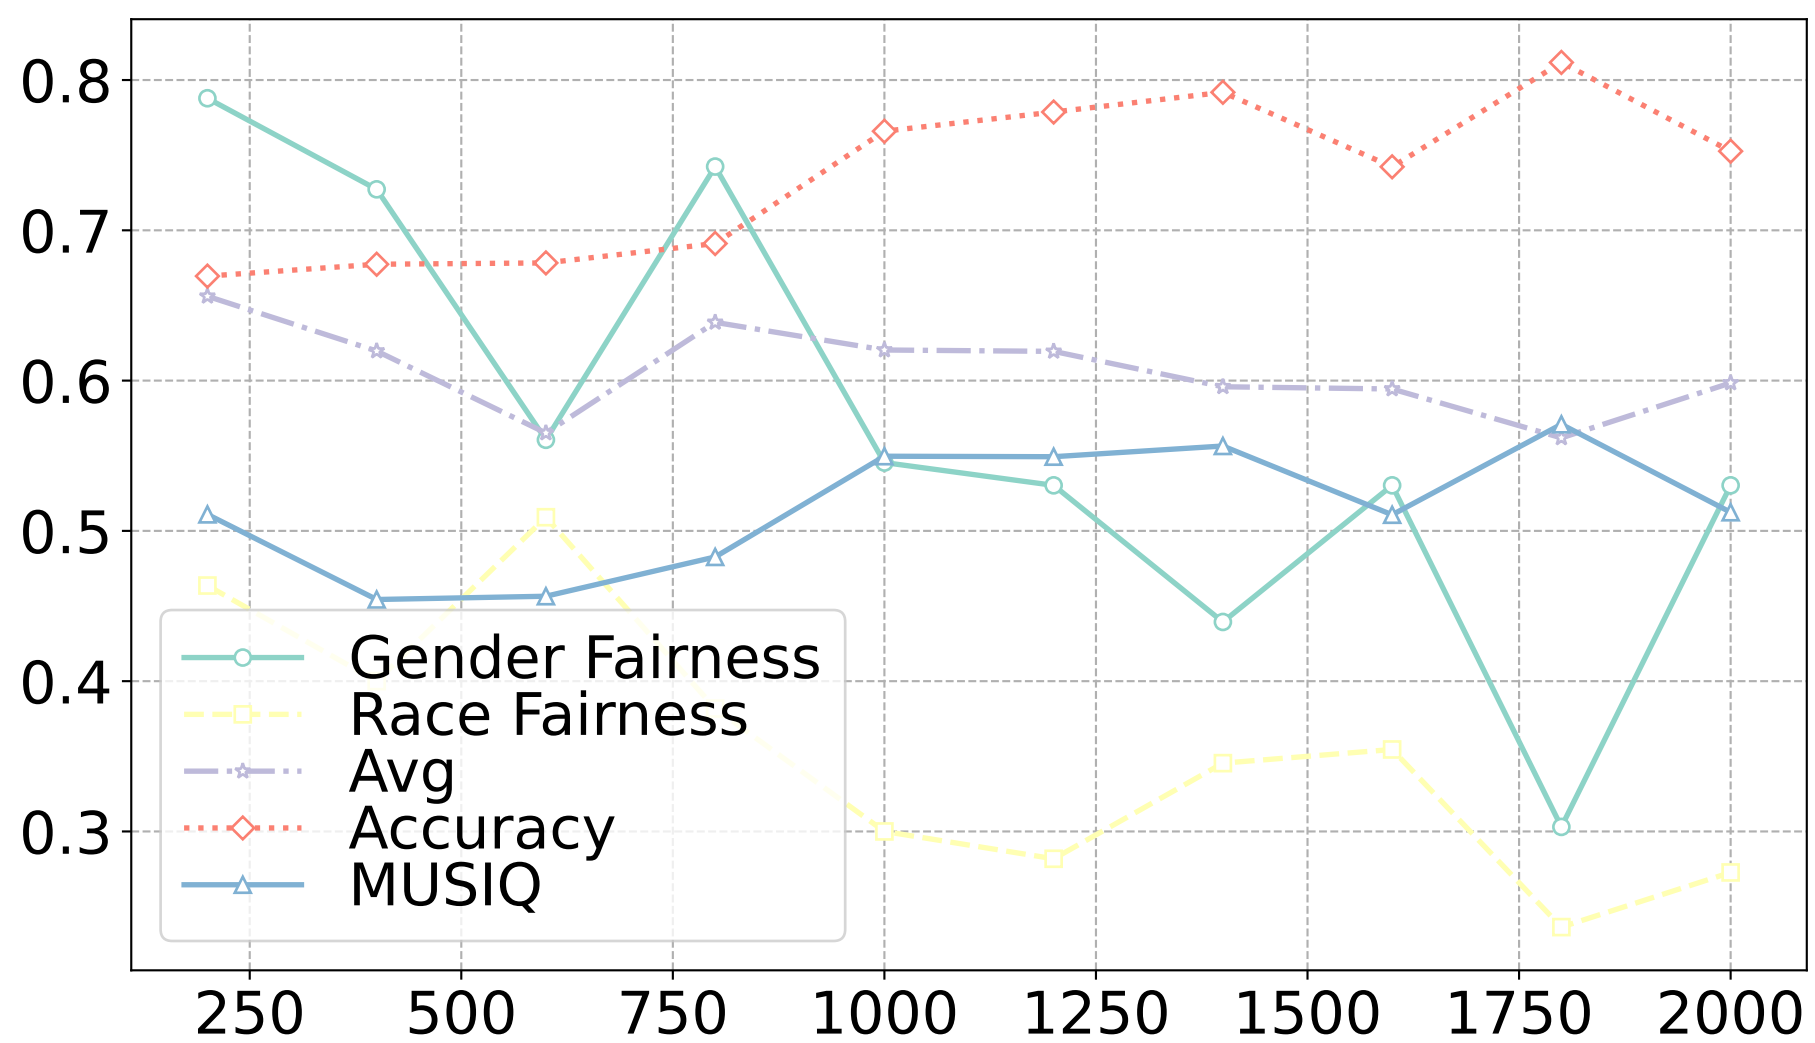

Supplement: supplementary_material [file fpca_genderrace_hdim.pdf › fair-img-gen-dev-main/paper/neurips25/imgs/fpca_genderrace_hdim.pdf]

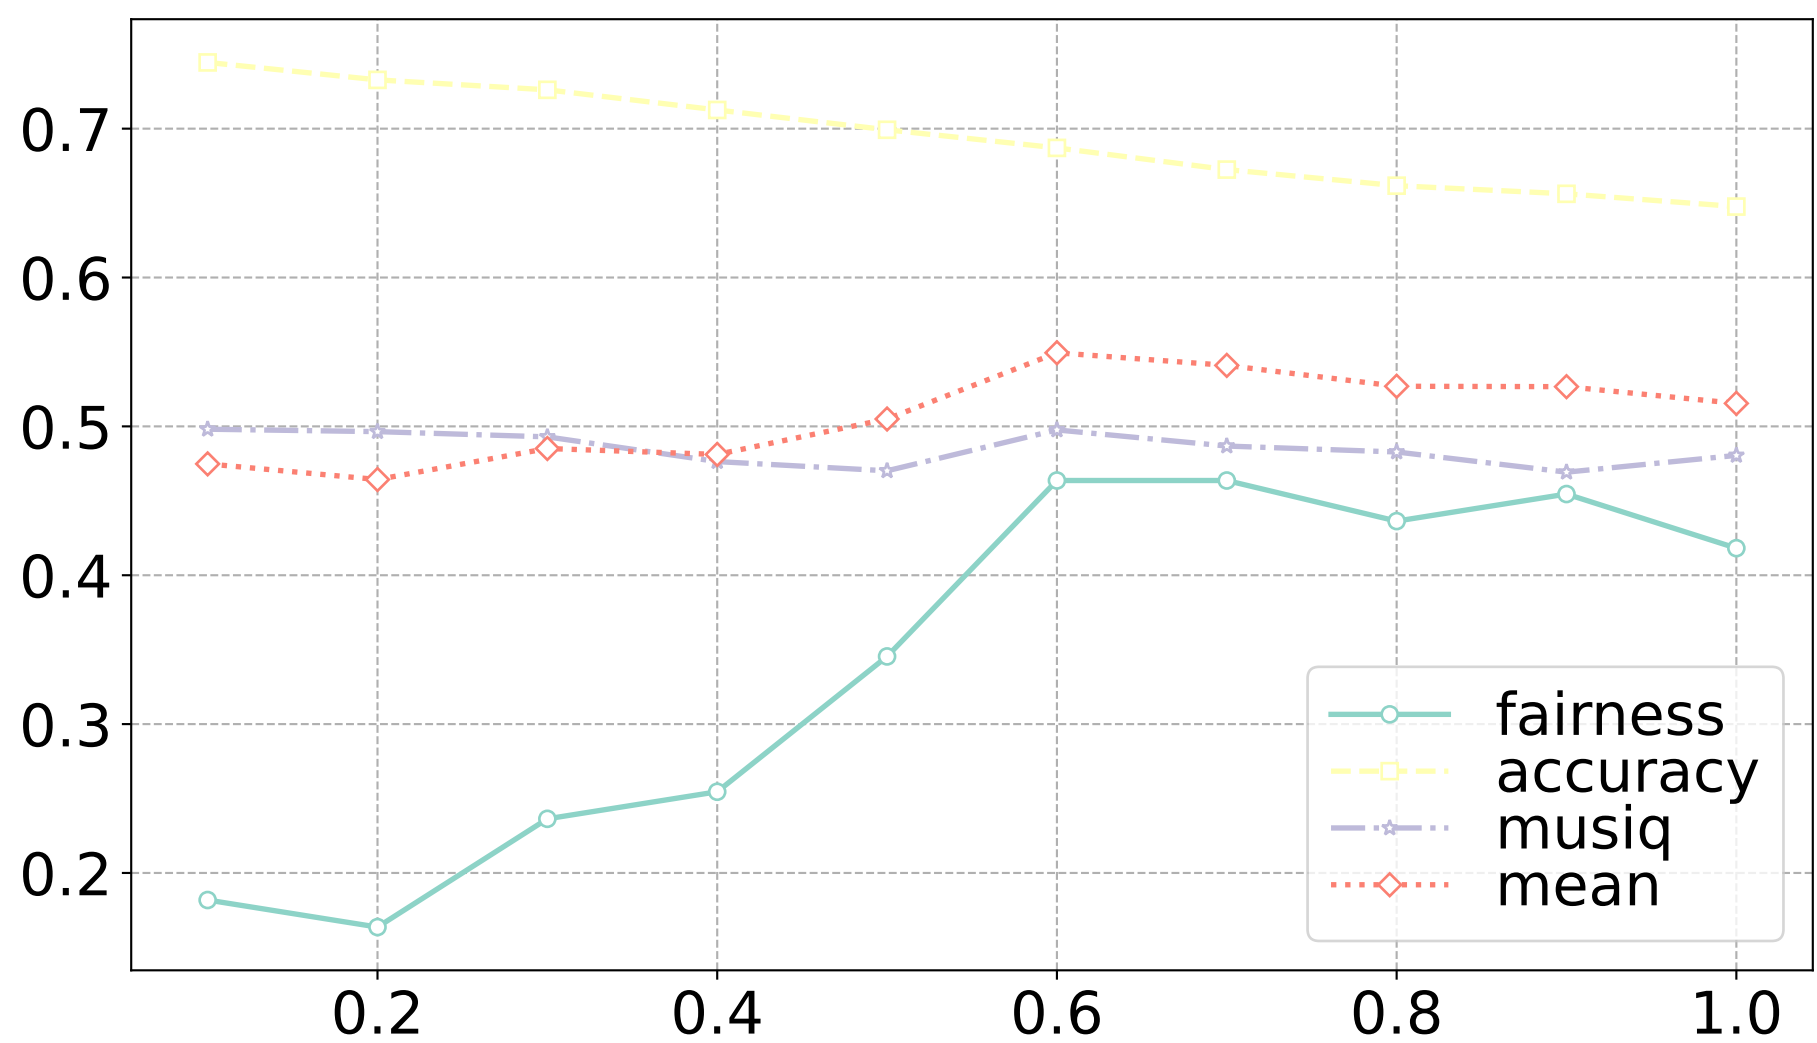

Supplement: supplementary_material [file fpca_race_enoise.pdf › fair-img-gen-dev-main/paper/neurips25/imgs/fpca_race_enoise.pdf]

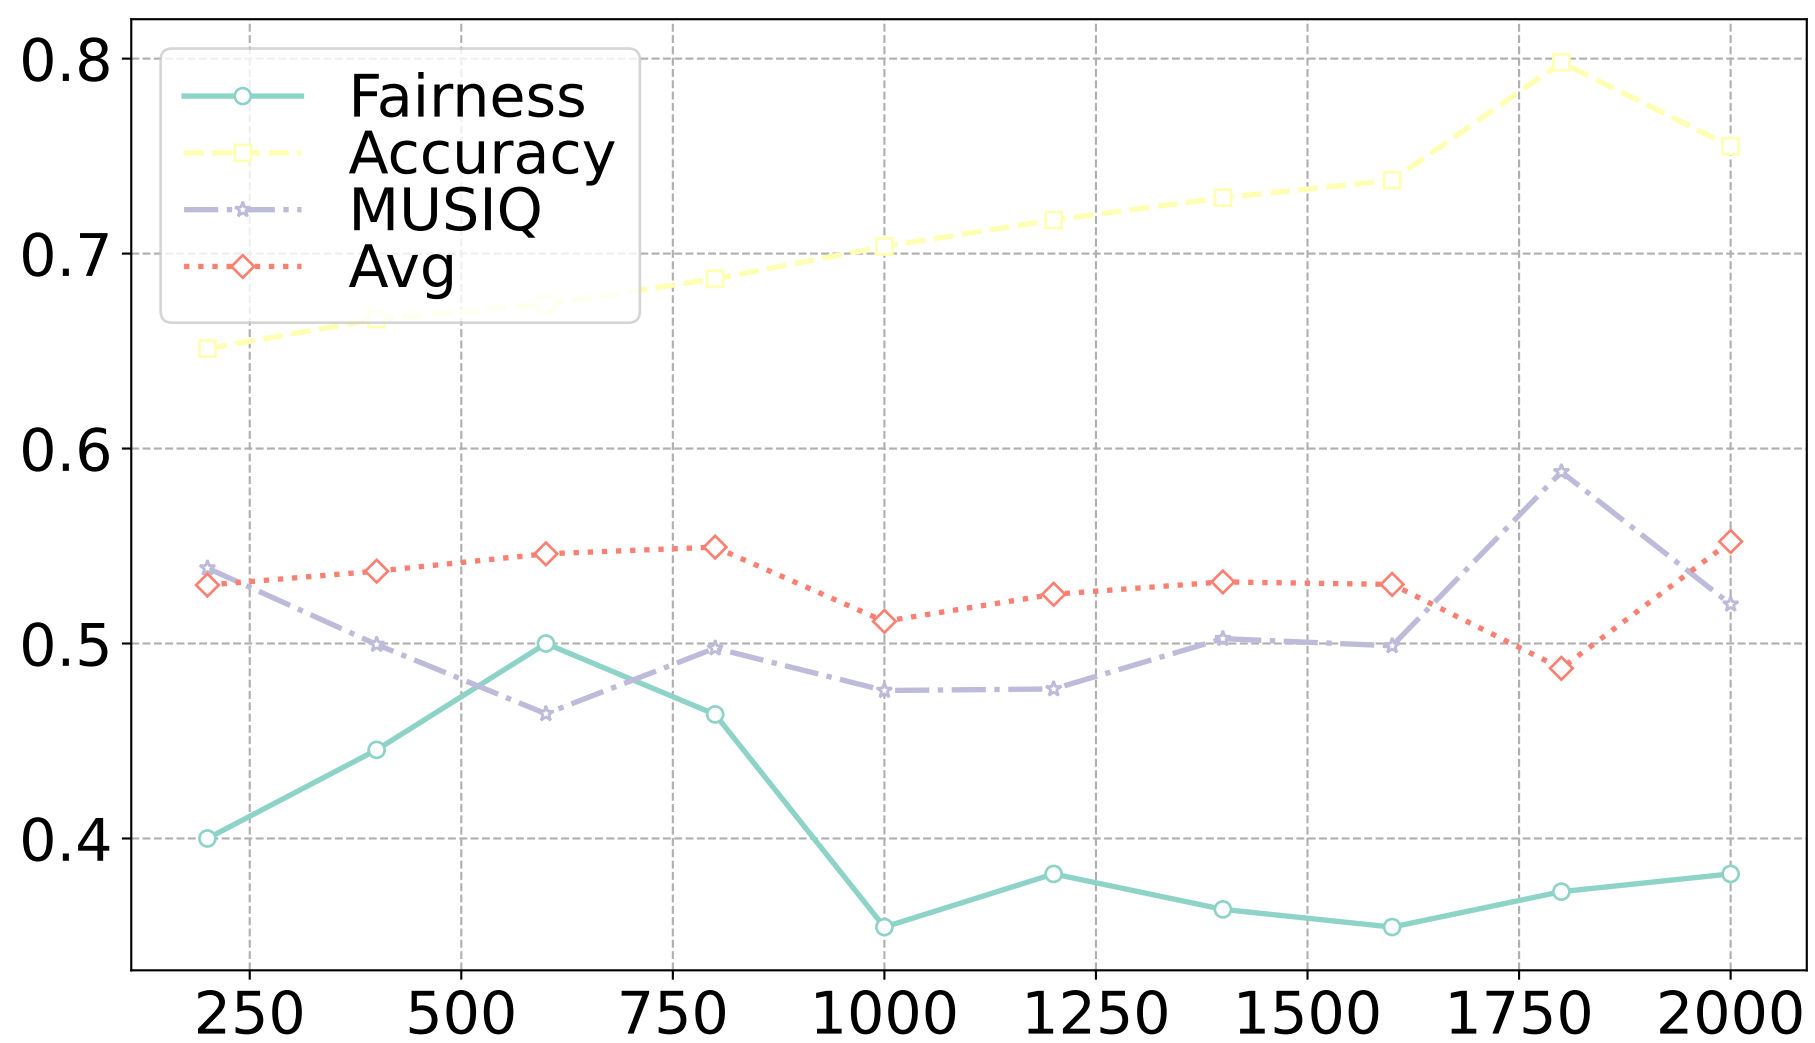

Supplement: supplementary_material [file fpca_race_hdim.pdf › fair-img-gen-dev-main/paper/neurips25/imgs/fpca_race_hdim.pdf]

Gender Proportions per Method (Sorted by Man Ratio)

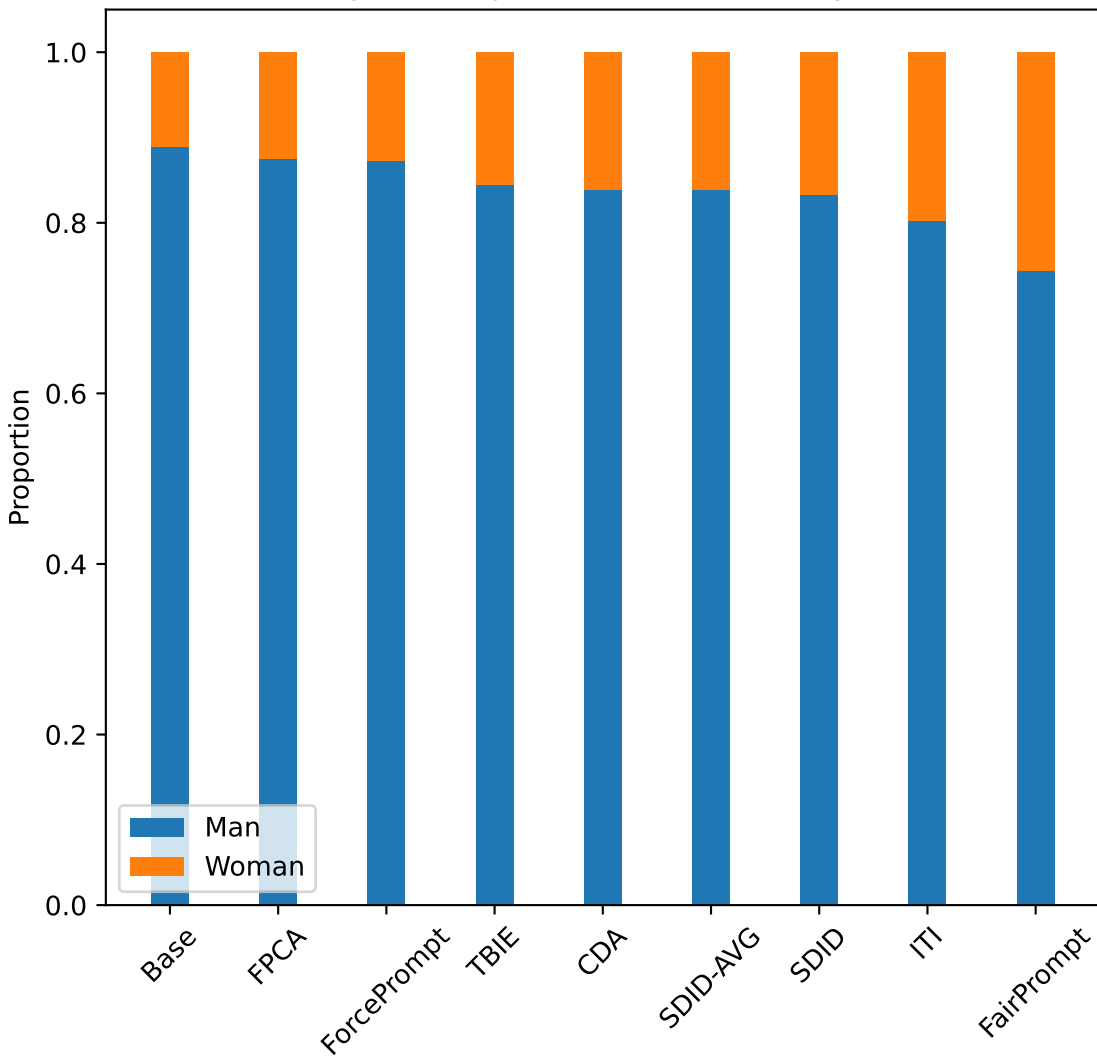

Supplement: supplementary_material [file gender_history.pdf › fair-img-gen-dev-main/paper/neurips25/imgs/gender_history.pdf]

Gender Proportions per Method (Ordered by Man Ratio)

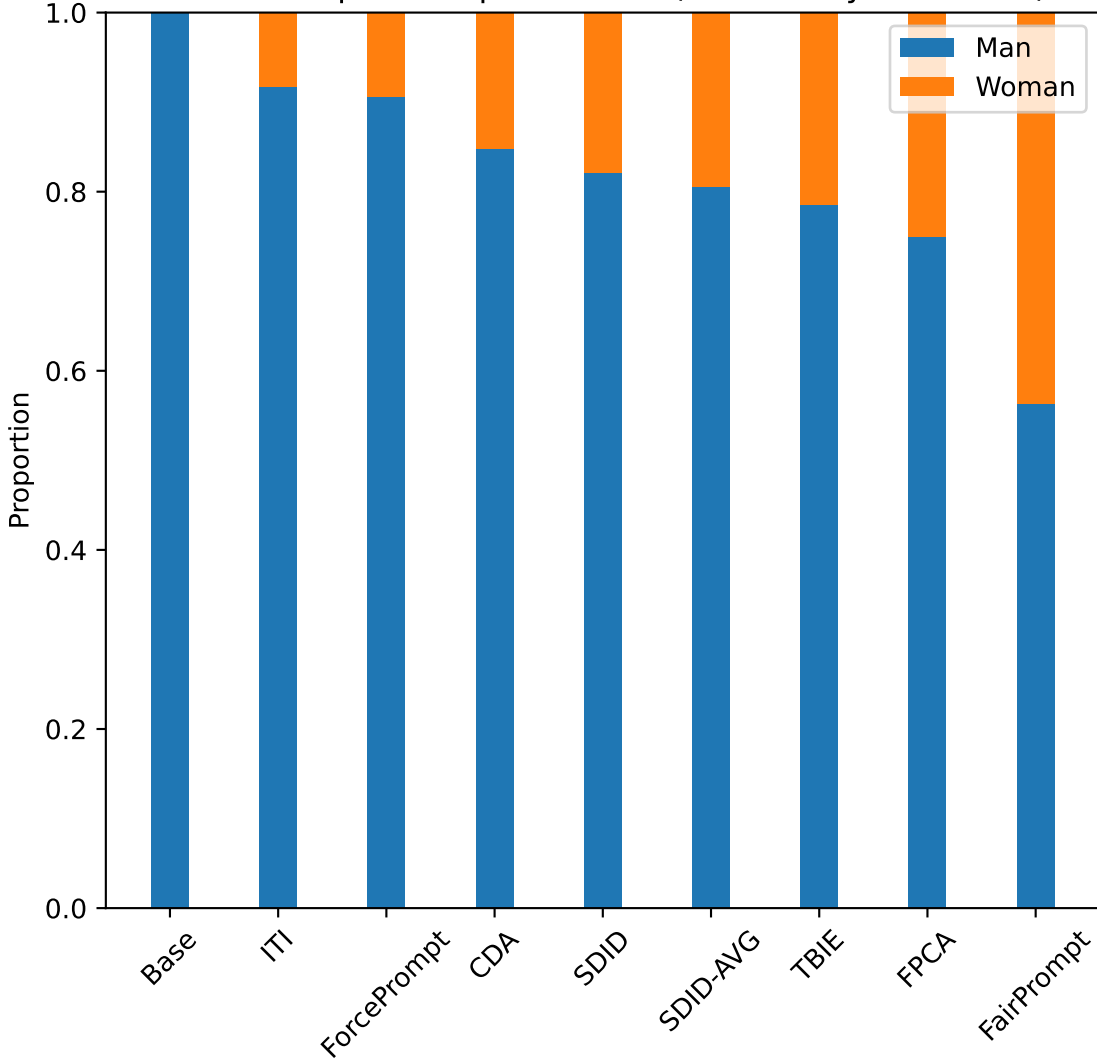

Supplement: supplementary_material [file gender_proportions.pdf › fair-img-gen-dev-main/paper/neurips25/imgs/gender_proportions.pdf]

Race Proportions per Method (Ordered by White Ratio)

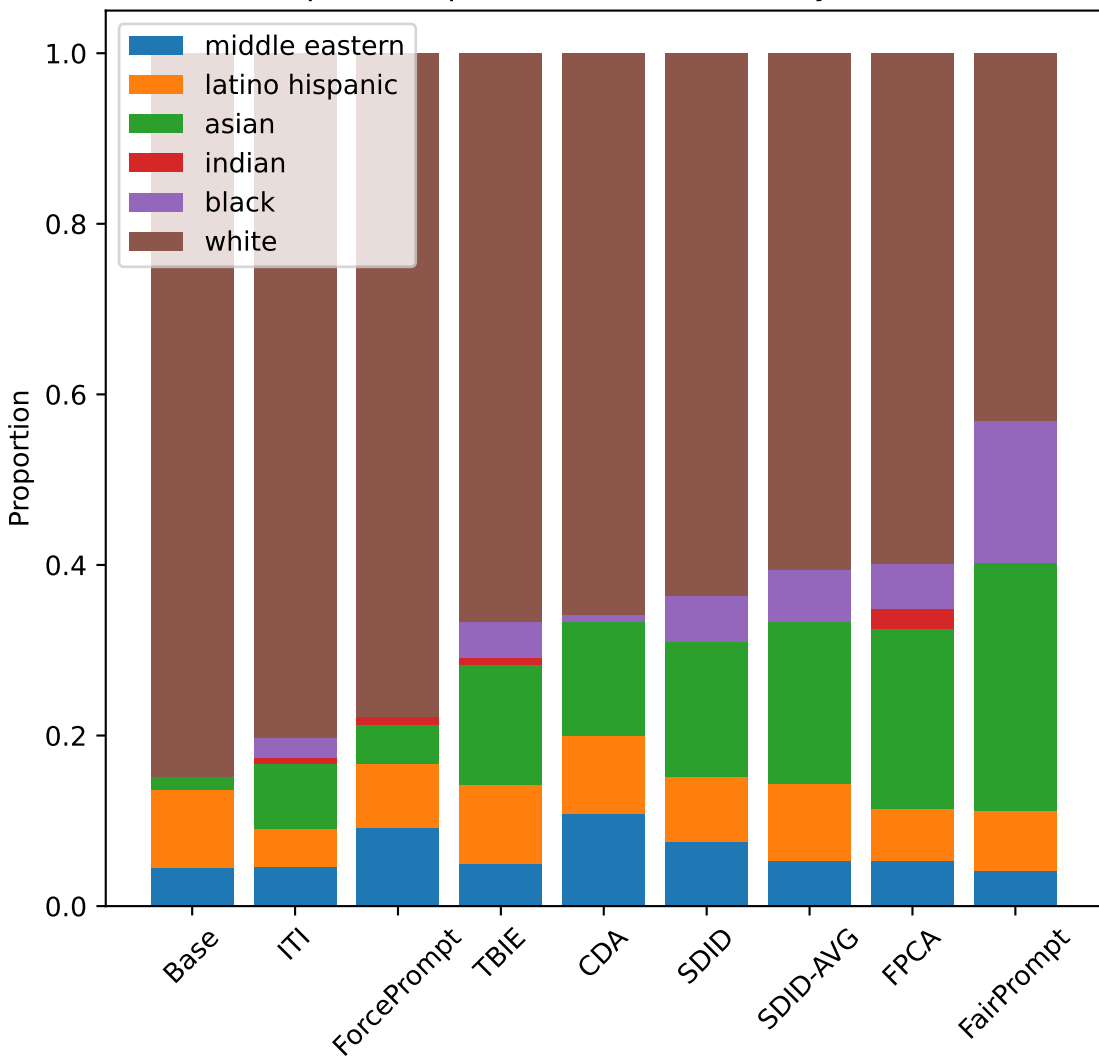

Supplement: supplementary_material [file race_proportions.pdf › fair-img-gen-dev-main/paper/neurips25/imgs/race_proportions.pdf]
